# Supplementary material
Source: publisher site journal article supplement (https://www.dovepress.com/get_supplementary_file.php?f=420298.docx)
Supplement: Supplementary file 1 [file get_supplementary_file.php]

**Legends for Supplementary Figures**


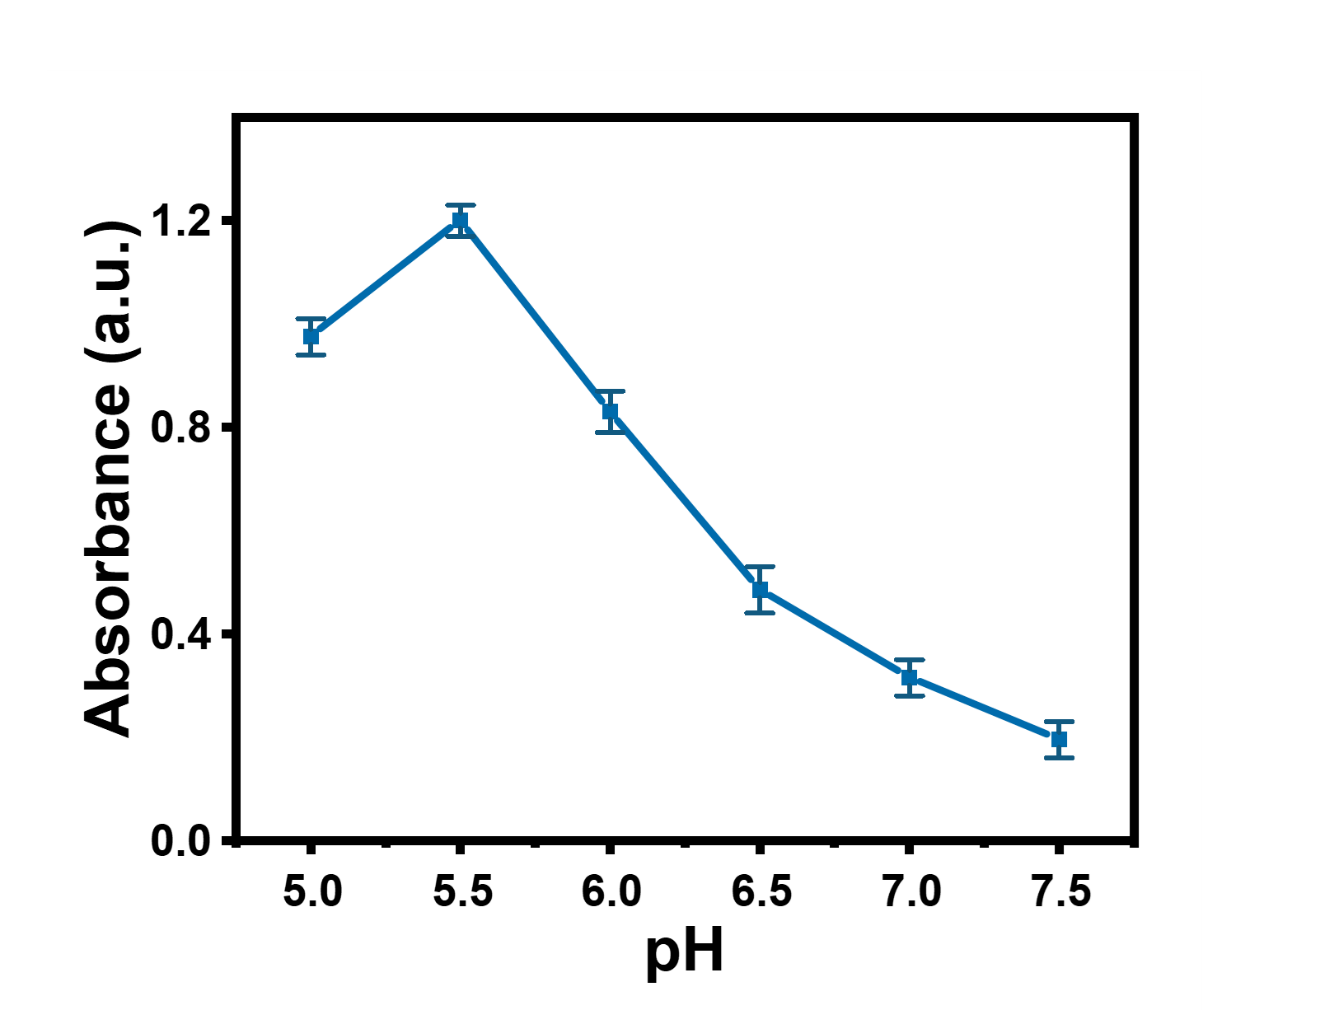


FigureS1. The effect of pH optimization on the peroxidase-like reaction catalysed by PC-NPs with TMB as the chromogenic substrate.


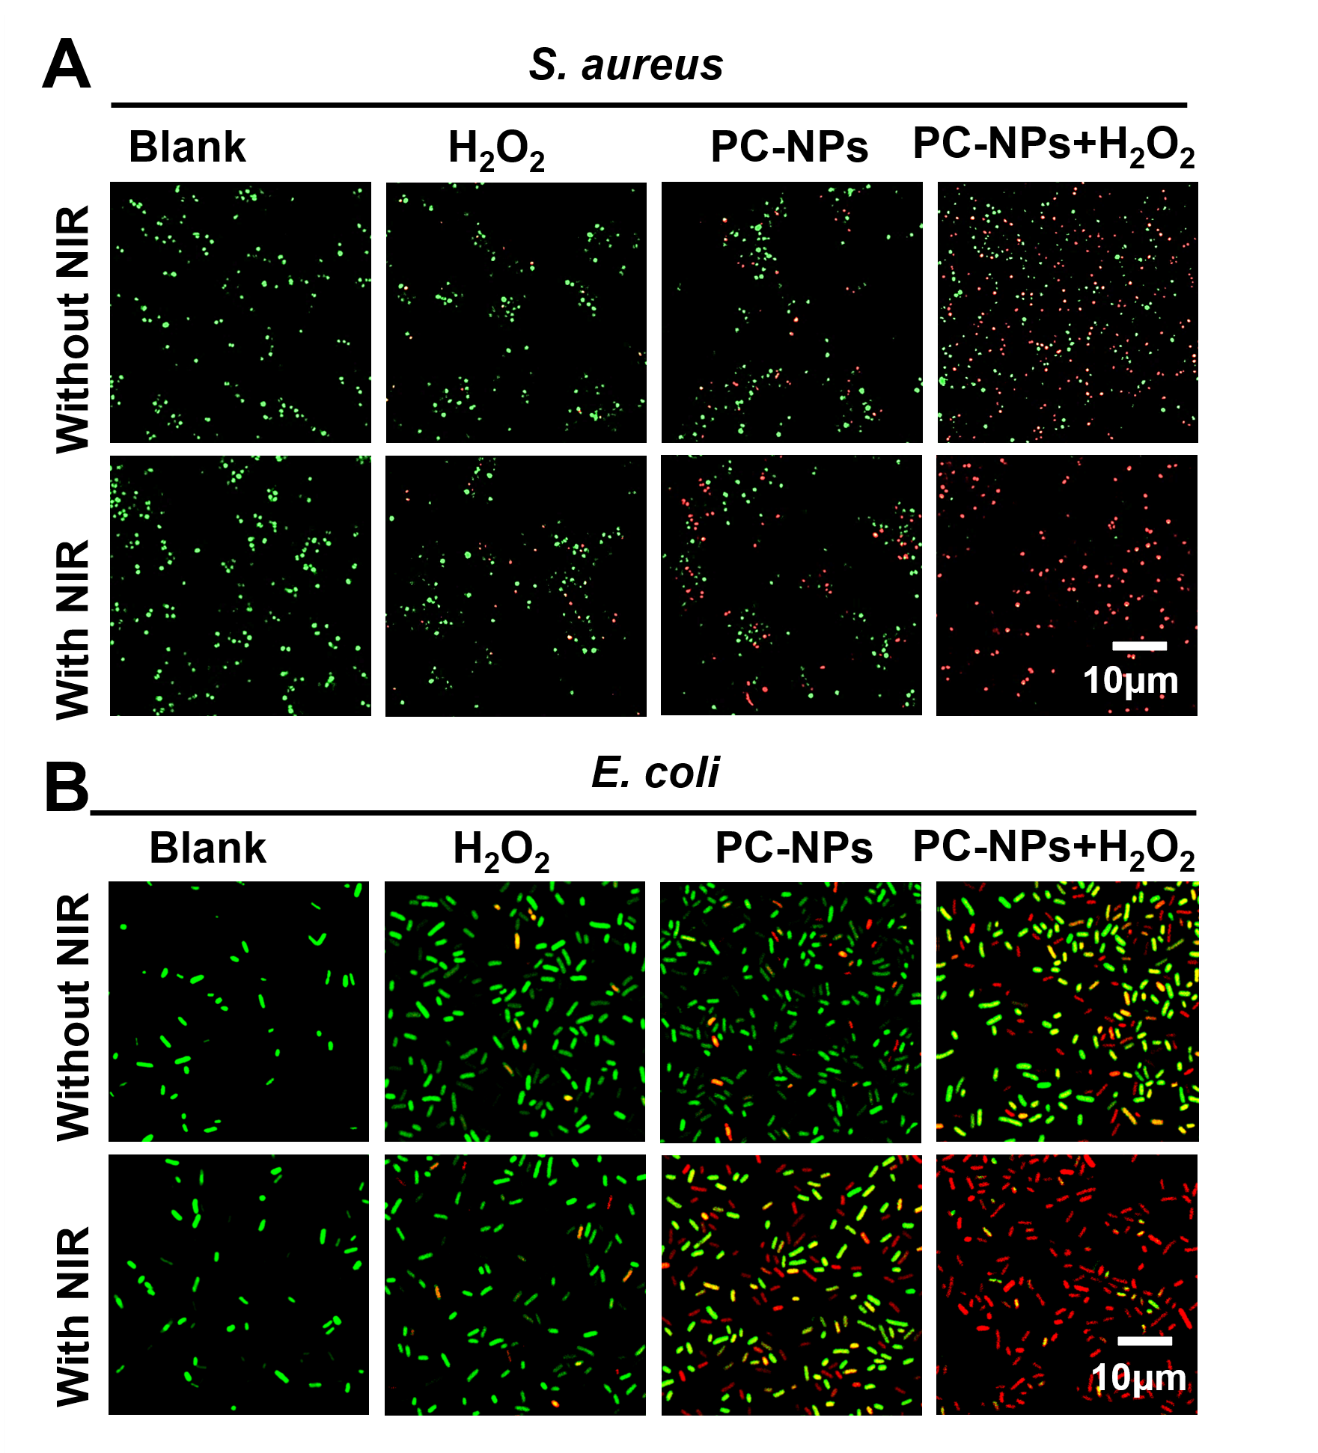


FigureS2. CLSM images of *S. aureus* (A) and *E. coli* (B) in different treatment groups.


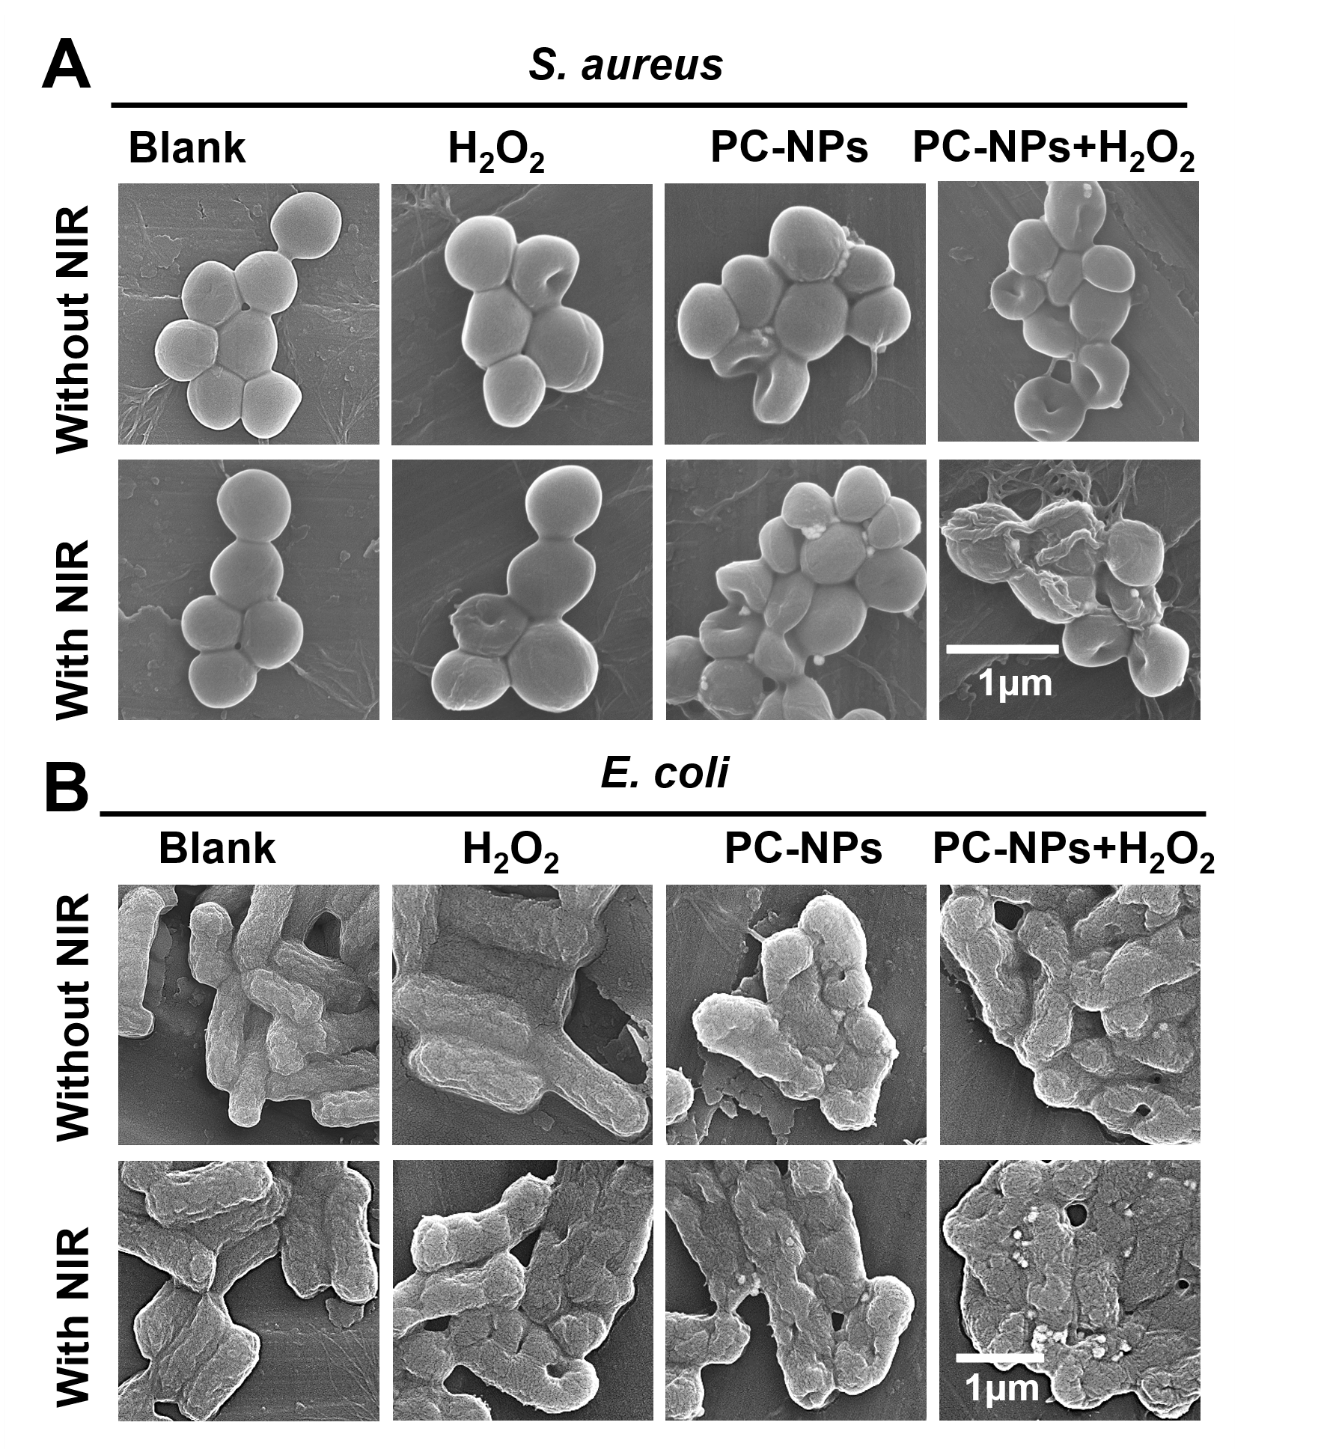


FigureS3. SEM images of *S. aureus* (A) and *E. coli* (B)under different conditions.


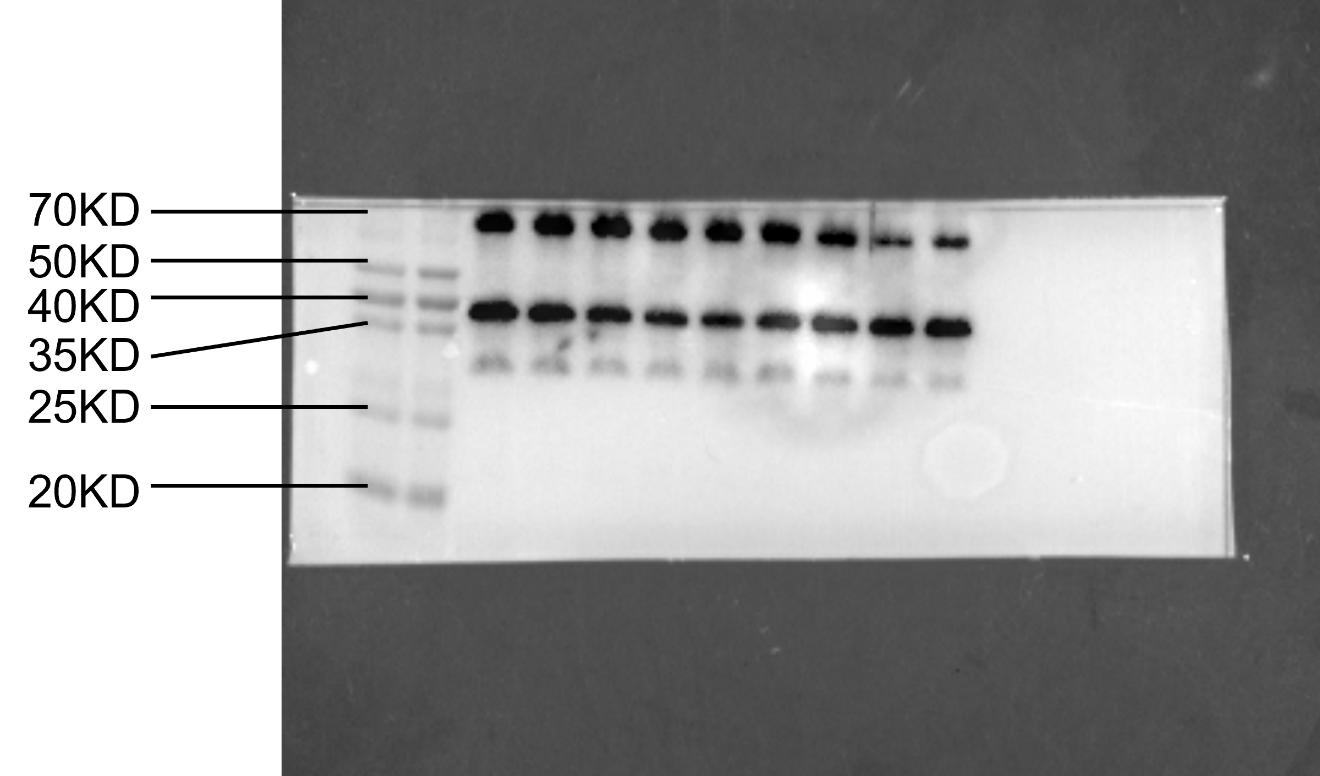


FigureS4. Uncropped image of western blotting assay in Figure5E.


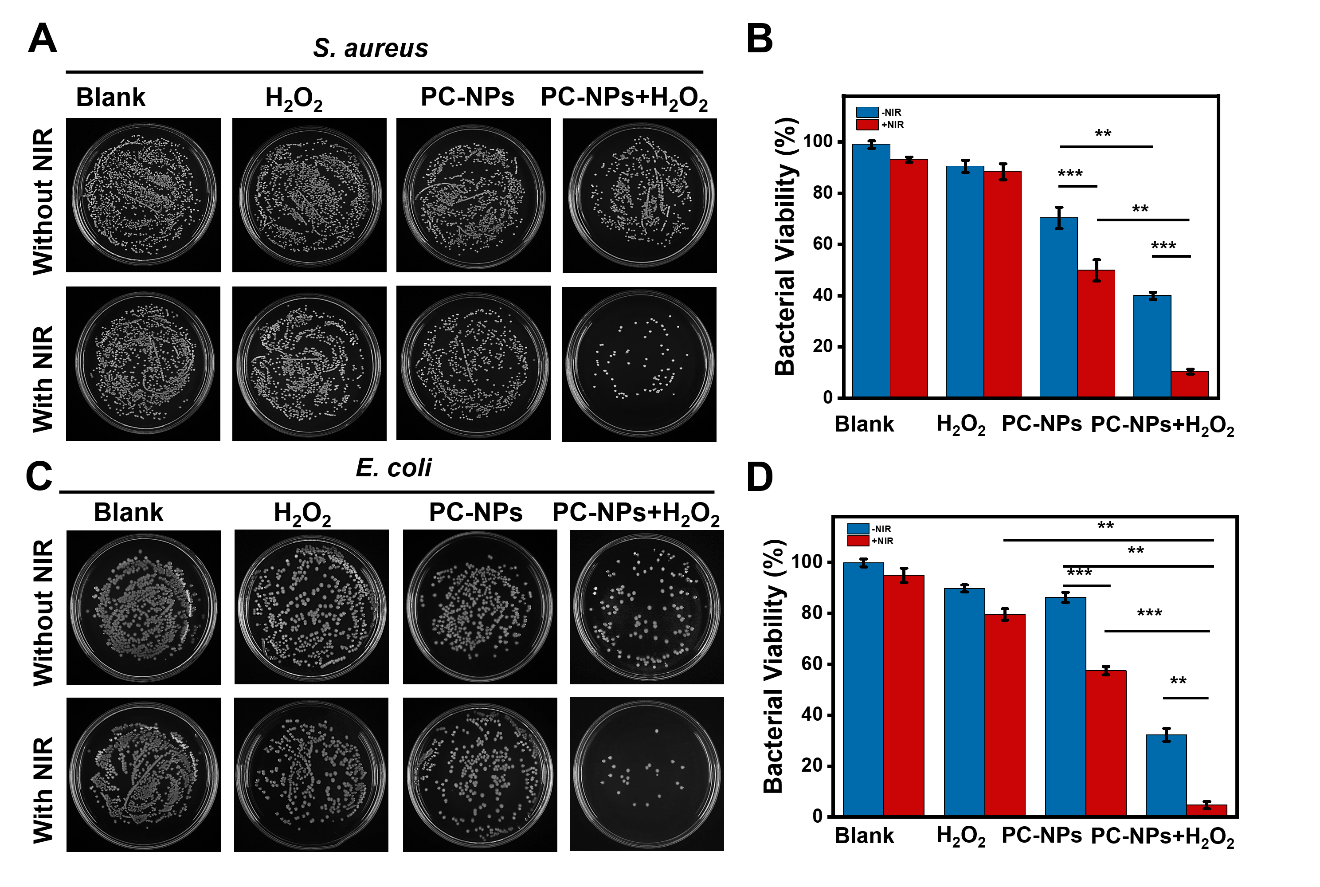


FigureS5. Representative plates of *S. aureus* (A) and *E. coli* (C) colonies detached from biofilms and corresponding antibiofilm efficiency (B&D).


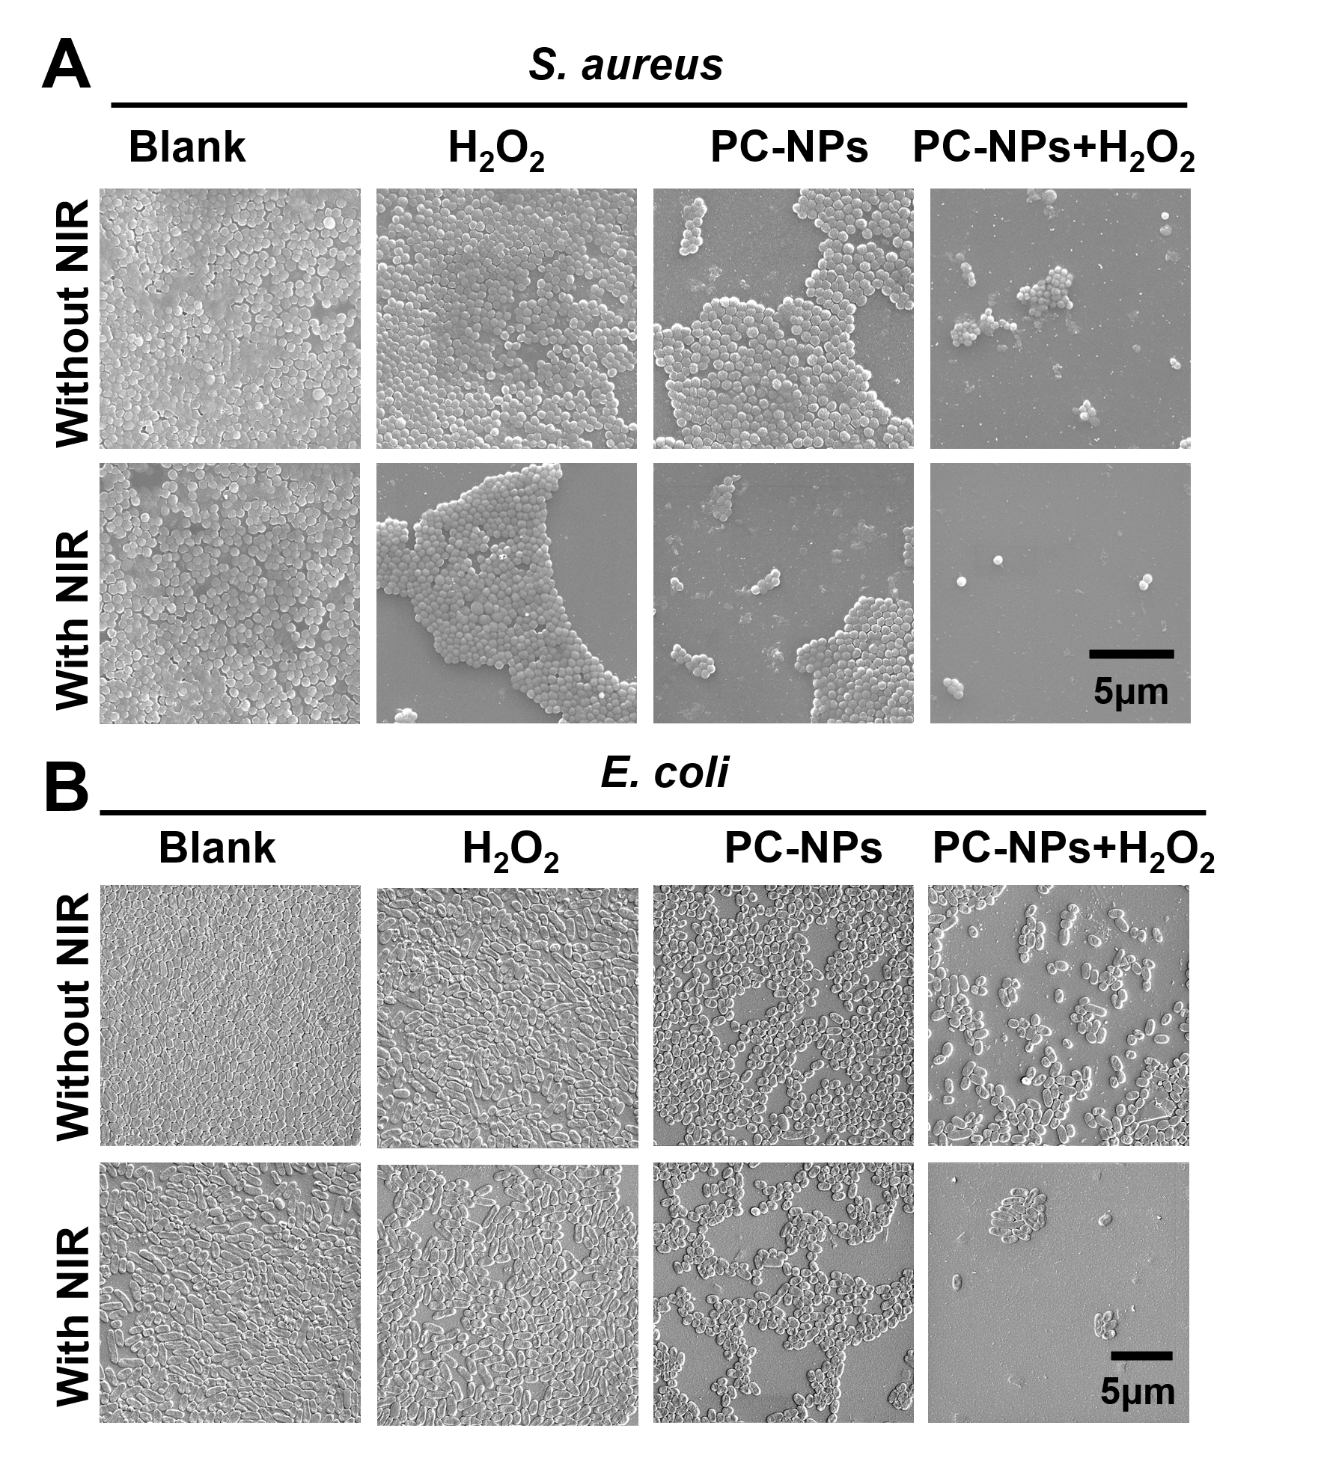


FigureS6. SEM images of *S. aureus* (A) and *E. coli* (B) biofilms with different treatments.


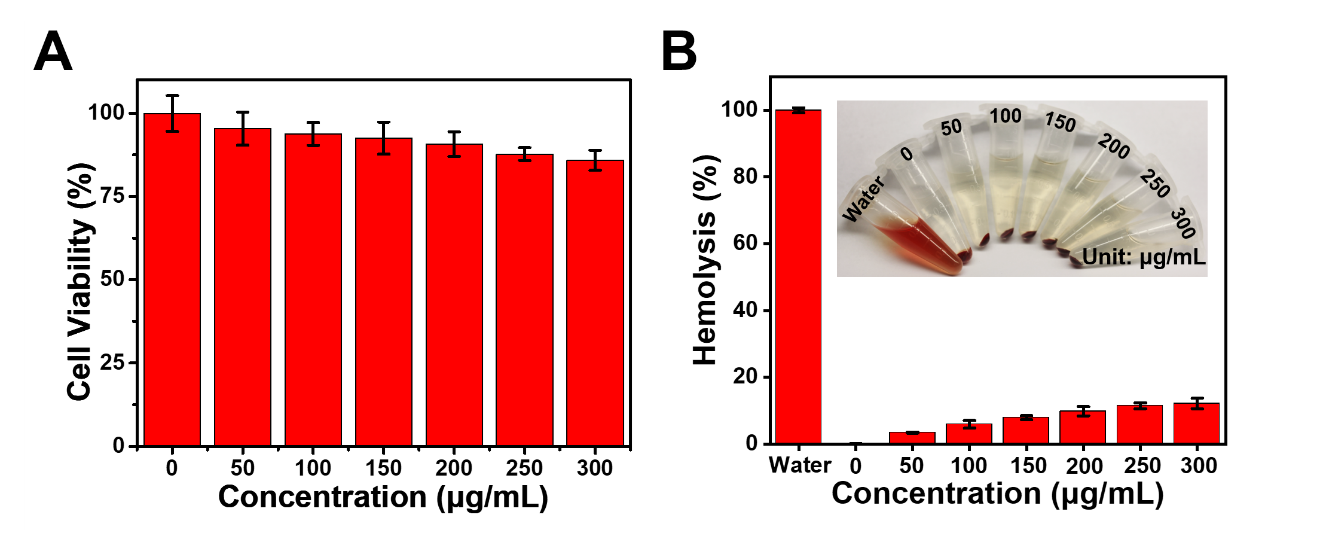


FigureS7. *In vitro* biocompatibility test. MTT cytotoxicity test (A) and haemolysis assay (B) for PC-NPs.
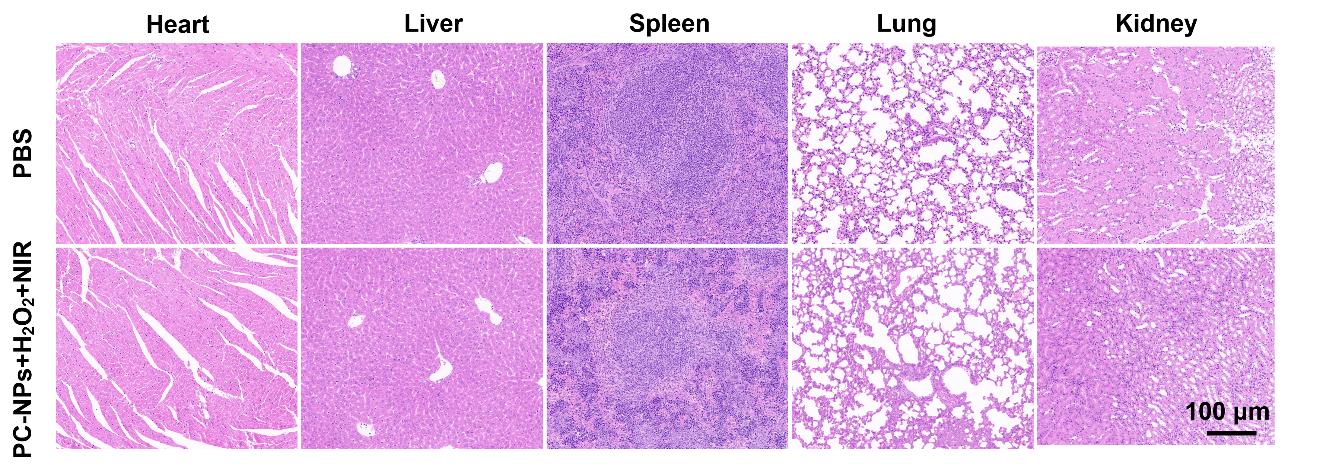


FigureS8. Histological analysis of heart, liver, spleen, lung and kidney of mice in PBS control group and treatment group.
